1           **Title: Distinct place cell dynamics in CA1 and CA3 encode experience in new contexts**

2                                   **Authors: Can Dong<sup>1</sup> and Mark E. J. Sheffield<sup>1\*</sup>**

3   **Affiliations:**

4   <sup>1</sup> Department of Neurobiology and Grossman Institute for Neuroscience, Quantitative Biology  
5   and Human Behavior, University of Chicago, Chicago, IL 60637, USA.

6   \* Correspondence to: [sheffield@uchicago.edu](mailto:sheffield@uchicago.edu).

7 **Abstract:** We compared trial-by-trial dynamics of place cells in CA1 and CA3 in new contexts  
8 across days. We found that CA1 place fields form early but shift backwards with experience and  
9 partially remap across days. In contrast, CA3 place fields develop gradually but remain stable  
10 with experience and across days. This suggests distinct plasticity mechanisms drive the  
11 formation and dynamics of place fields in CA1 and CA3 to encode distinct features of  
12 experience.

13 **Main text:** The hippocampus plays a critical role in learning by rapidly forming and continuously  
14 updating experience-driven representations in the brain<sup>1,2</sup>. Representations of contextual  
15 experience are encoded and recalled by populations of place cells in hippocampal sub-regions  
16 CA1, CA3, and dentate gyrus<sup>3,4</sup>. Synaptic plasticity within these sub-regions is the key process  
17 that alters and stores representations and comes in many forms<sup>5,6</sup>. Understanding how place  
18 cell representations form, evolve, and are recalled within distinct hippocampal sub-regions  
19 during novel experiences can therefore provide key insights into the types of synaptic plasticity  
20 mechanisms that are at play during learning and memory recall. Further, because synaptic  
21 plasticity mechanisms can work on rapid timescales to continually alter place cell activity, it is  
22 essential to determine the real-time place cell dynamics on a trial-by-trial basis. However, the  
23 trial-by-trial dynamics of hippocampal place cells during the first moments of a novel  
24 experience and throughout ongoing experience measured over long timescales (across days)  
25 has not been systematically compared between CA1 and CA3.

26 To address this, we expressed GCaMP6f in either the CA1 or CA3 sub-region of different mice  
27 (Fig. 1c, d). The Grik4-cre line<sup>7</sup> was used to restrict expression to CA3 pyramidal neurons (Fig.

28 1c). Using 2-photon microscopy we then recorded calcium transients from pyramidal cell  
29 populations in both regions (Extended Data Fig. 1)<sup>8,9</sup>. On experimental day 1 mice were exposed  
30 to a familiar (F) context before being switched to a novel context (N1) (Fig. 1a)<sup>9</sup>. On  
31 experimental day 2, mice experienced the same F-to-N switch but to a different N context (N2;  
32 Fig. 1a). N1 and N2 were grouped together and are referred to as N. Mice momentarily slowed  
33 down after the transition between contexts (Fig. 1b), confirming their perception of the switch.  
34 This paradigm led to many repeated traversals in both contexts with matched behavior,  
35 allowing lap-by-lap place field (PF) dynamics to be measured systematically and compared  
36 across F and N contexts without confounds caused by changes in behavior.

37 Upon exposure to N, both CA1 and CA3 place cells globally remapped (Fig. 1e, f) and displayed  
38 altered PFs compared to F (Extended Data Fig. 2). Crucially, we wanted to observe the real-time  
39 formation of new place cells in CA1 and CA3 to examine potential differences in their formation  
40 dynamics. Therefore, formation of new PFs in N was quantified on a lap-by-lap basis (Fig. 1g-i).  
41 Some PFs formed instantly, i.e. on the first lap (Instant PFs; Fig. 1g; left), while others were  
42 delayed by several laps (Delayed PFs; Fig. 1g; right). Similar to previous observations, many CA1  
43 PFs formed rapidly<sup>6,9</sup>, with a high proportion of instant PFs (30%; Fig. 1h, i). Unexpectedly, only  
44 9% of CA3 PFs were instant and the distribution of PF onset laps was more uniform, indicating  
45 CA3 place cell representations form more gradually than CA1 representations (Fig. 1h, i;  
46 Extended Data Fig. 2c, d). Supporting this, CA1 place cell activity decoded position on the first  
47 lap better than CA3 place cell activity (Fig. 1j-l, Extended Data Fig. 3). These data suggest that in  
48 a novel context, CA1 instantly forms a well-organized map, whereas CA3 forms a map gradually  
49 with experience.

50 What do these observations suggest about synaptic plasticity mechanisms? First, some models  
51 of CA1 place field formation require the presence of spatially tuned presynaptic inputs from  
52 CA3<sup>5,10</sup>. In this scheme, spatially tuned CA3 inputs coincident with inputs from entorhinal cortex  
53 (EC) generate dendritic plateau potentials in CA1 cells that drive synaptic potentiation<sup>11</sup>. The  
54 lack of spatially tuned CA3 cells that we found on lap 1 suggests CA1 instant place fields are not  
55 formed through this mechanism, and may instead form through other direct inputs from EC or  
56 Nucleus Reunions<sup>12</sup>. Second, delayed CA1 PFs have been proposed to form through a process  
57 of local dendritic spikes that occur on the initial laps in the absence of somatic firing. This  
58 potentiates local clusters of synapses that become strong enough to drive firing, and possibly  
59 plateau potentials, after a delay, to form new PFs<sup>6,9-11,13,14</sup>. Because we found the vast majority  
60 of CA3 PFs form after a delay, our data suggest a similar mechanism is at play in CA3.

61 To examine plasticity mechanisms occurring after PFs have formed in CA1 and CA3, we tracked  
62 new PFs throughout experience in N. We compared the first and second half of N and found  
63 CA3 PFs were more stable than CA1 PFs (Fig. 2a). Next, we computed each PF's center of mass  
64 (COM) on a lap-by-lap basis in N in both regions. Some PFs were stable throughout N, whereas  
65 others shifted systematically throughout the session (Fig. 2b). Averaging across the PF  
66 population, PFs shifted backwards in both regions, but significantly more so in CA1 than CA3  
67 (Fig. 2c, Extended Data Fig. 4).

68 Asymmetric synaptic plasticity mechanisms, such as spike-timing-dependent plasticity (STDP)<sup>15</sup>  
69 and behavioral time-scale plasticity (BTSP)<sup>5,10</sup>, predict such backward shifting<sup>15</sup>. These two  
70 forms of plasticity occur over different timescales (milliseconds for STDP, seconds for BTSP), so

71 we calculated the timescale of backward shifting CA1 PFs to determine which form of plasticity  
72 may be occurring. Based on the ability of STDP to potentiate synapses activated up to ~20 ms  
73 prior to postsynaptic firing<sup>16</sup>, we calculated PFs would shift maximally  $0.48 \pm 0.15$  cm/lap (mean  
74  $\pm$  SD) through STDP based on the average running speed of our mice ( $24.1 \pm 7.5$  cm/s mean  $\pm$   
75 SD). On average, backward shifting PFs in CA1 shifted by  $0.34 \pm 0.34$  cm/lap (mean  $\pm$  SD). This  
76 provides strong support that STDP is the mechanism driving continuous backward shifting.  
77 Further, STDP is known to occur at CA1-CA3 synapses<sup>16</sup> and given the relative stability of CA3  
78 PFs concurrent with the CA1 backward shifting PFs we observed here, it suggests STDP is  
79 occurring at these synapses to drive the backward shifting of CA1 PFs (although other synapses  
80 could also be involved).

81 Memory recall of spatial contexts is supported by the reactivation of stable PFs upon re-  
82 exposures<sup>4</sup>. We therefore examined the same place cells upon re-exposure to N across days  
83 (Fig. 3a). On day 2, mouse behavior on the first lap of N revealed mice had become more  
84 familiar with N (Extended Data Fig. 5a, b). We then quantified the spatial correlation of mean  
85 PFs identified on N day 1 with N day 2 (Fig. 3b-e), which was on average significantly higher in  
86 CA3 than CA1 (Fig. 3c-e). The bimodal distribution of CA3 PF spatial correlations (Fig. 3c;  
87 bottom), helped categorize PFs as either stable (spatial correlation  $> 0.5$ , green) or unstable ( $<$   
88  $0.5$ ; light-green). In all mice we found that CA3 had a higher fraction of stable PFs compared to  
89 CA1 in (Fig. 3d).

90 We then compared the PF onset laps of stable PFs on day 2 (Fig. 3f, left) with PFs that newly  
91 formed on day 2, which included both unstable PFs from day 1 (Fig. 3f, middle) and PFs that

92 appeared for the first time on day 2 (Fig. 3f, right). We found that stable PFs appeared earlier in  
93 the session than newly formed PFs, and this difference was much more significant in CA3 than  
94 CA1 (Fig. 3g). This also shows that a high proportion of CA1 PFs are continuously forming even  
95 as the context becomes familiar. These findings reveal that place cell representations that form  
96 following exposure to novel contexts are more stable in CA3 than CA1. Stable PFs are instantly  
97 reactivated on the second day of exposure and the CA1 continuously forms a high proportion of  
98 new PFs. The greater reorganization of CA1 place cell representations across exposures  
99 suggests offline plasticity in the CA1, possibly occurring during sleep<sup>17</sup>.

100 Is the reorganization of CA1 PFs across days due to a continuation of the backward shifting that  
101 occurs within the session on day 1, possibly during offline activation, or a process more akin to  
102 partial/global remapping? To answer this, we calculated the difference between each PF's COM  
103 on the last active lap on day 1 and first active lap in day 2 (Fig. 3h). The mean of the  
104 distributions in both CA1 and CA3 were not statistically different from 0 (Fig. 3h), revealing no  
105 evidence for systematic backward shifting occurring offline. This shows that backward shifting is  
106 an experience-dependent process and the reorganization of CA1 PFs across days is a process  
107 akin to partial/global remapping.

108 Lastly, we determined whether the backward shifting we had observed on day 1 in N continued  
109 upon re-exposure to N on day 2. We found that lap-by-lap the CA1 systemically shifted  
110 backwards throughout the first part of the session, yet the CA3 map remained relatively stable  
111 throughout the session (Fig. 3i). This was also true in F (Extended Data Fig. 6), although the  
112 extent of CA1 backward shifting decreased with familiarity. This shows that asymmetric CA1

113 plasticity mechanisms are occurring in novel and familiar contexts, but the level of novelty  
114 enhances this process.

115 What might be the function of these differences in the formation and plasticity of place cell  
116 representations in CA1 and CA3? First, instant CA1 PFs could mediate the ability of the  
117 hippocampus to rapidly learn and store episodes of events on a single trial<sup>18</sup>. The backward  
118 shifting of the PF population we observed during ongoing experience could allow the CA1 to  
119 gradually predict future locations within a context<sup>5,19</sup>. Indeed, asymmetric plasticity rules  
120 automatically produce predictions of the future by strengthening synapses that are activated  
121 earlier along the track with each traversal<sup>15</sup>. The CA1, then, rapidly generates unique  
122 representations of the world that are then continuously shaped by exploratory experience to  
123 predict the near future (where am I going?). In parallel, the CA3 gradually forms  
124 representations that are preserved during experience and encode the present moment (where  
125 am I currently?). This function seemingly extends across time as relatively stable CA3 place cell  
126 representations are rapidly reinstated upon re-exposure to the same context, possibly to  
127 support memory recall. Offline reorganization of CA1 place cell representations across days  
128 may instead serve to separate events occurring in the same context into distinct memories<sup>20</sup>.

129 This framework is depicted in a conceptual model in Extended Data Fig. 7. Given the known  
130 circuitry between CA3 and CA1, the independent nature of CA1 encoding relative to CA3  
131 (instant PF formation and reorganization across days) suggests the formation and recall of CA1  
132 place cell representations is substantially influenced by other inputs (Entorhinal cortex and  
133 Nucleus Reunions<sup>12</sup>).

134 **Acknowledgments:** We thank D. Dombeck and A. Madar for comments on the manuscript, C.  
135 Cherian for helpful manuscript edits, and members of Sheffield lab for manuscript comments  
136 and useful discussions. **Funding:** This work was supported by: The Whitehall Foundation, The  
137 Searle Scholars Program, The Sloan Foundation, The University of Chicago Grossman Institute  
138 for Neuroscience start-up funds, and the NIH (1DP2NS111657-01). **Author contributions:** C.D.  
139 performed surgeries, collected the data, wrote the analysis code and analyzed data. M.S. and  
140 C.D. conceived and designed the experiments and interpreted the data. M.S. wrote the  
141 manuscript with feedback from C.D. **Competing interests:** Authors declare no competing  
142 interests and **Data and materials availability:** Scripts used for data analysis are available on  
143 Github and raw data is available upon request.

144 **References:**

- 145 1 Parisi, G. I., Kemker, R., Part, J. L., Kanan, C. & Wermter, S. Continual lifelong learning  
146 with neural networks: A review. *Neural Netw* **113**, 54-71,  
147 doi:10.1016/j.neunet.2019.01.012 (2019).
- 148 2 Kitamura, T. *et al.* Engrams and circuits crucial for systems consolidation of a memory.  
149 *Science* **356**, 73-78, doi:10.1126/science.aam6808 (2017).
- 150 3 Hainmueller, T. & Bartos, M. Parallel emergence of stable and dynamic memory  
151 engrams in the hippocampus. *Nature* **558**, 292-296, doi:10.1038/s41586-018-0191-2  
152 (2018).
- 153 4 Dupret, D., O'Neill, J., Pleydell-Bouverie, B. & Csicsvari, J. The reorganization and  
154 reactivation of hippocampal maps predict spatial memory performance. *Nat Neurosci*  
155 **13**, 995-1002, doi:10.1038/nn.2599 (2010).



- 156 5 Magee, J. C. & Grienberger, C. Synaptic Plasticity Forms and Functions. *Annu Rev*  
157 *Neurosci*, doi:10.1146/annurev-neuro-090919-022842 (2020).
- 158 6 Sheffield, M. E. & Dombeck, D. A. Dendritic mechanisms of hippocampal place field  
159 formation. *Curr Opin Neurobiol* **54**, 1-11, doi:10.1016/j.conb.2018.07.004 (2019).
- 160 7 Nakazawa, K. *et al.* Requirement for hippocampal CA3 NMDA receptors in associative  
161 memory recall. *Science* **297**, 211-218, doi:10.1126/science.1071795 (2002).
- 162 8 Sheffield, M. E. & Dombeck, D. A. Calcium transient prevalence across the dendritic  
163 arbour predicts place field properties. *Nature* **517**, 200-204, doi:10.1038/nature13871  
164 (2015).
- 165 9 Sheffield, M. E. J., Adoff, M. D. & Dombeck, D. A. Increased Prevalence of Calcium  
166 Transients across the Dendritic Arbor during Place Field Formation. *Neuron* **96**, 490-504  
167 e495, doi:10.1016/j.neuron.2017.09.029 (2017).
- 168 10 Bittner, K. C., Milstein, A. D., Grienberger, C., Romani, S. & Magee, J. C. Behavioral time  
169 scale synaptic plasticity underlies CA1 place fields. *Science* **357**, 1033-1036,  
170 doi:10.1126/science.aan3846 (2017).
- 171 11 Bittner, K. C. *et al.* Conjunctive input processing drives feature selectivity in hippocampal  
172 CA1 neurons. *Nat Neurosci* **18**, 1133-1142, doi:10.1038/nn.4062 (2015).
- 173 12 Dolleman-van der Weel, M. J. *et al.* The nucleus reuniens of the thalamus sits at the  
174 nexus of a hippocampus and medial prefrontal cortex circuit enabling memory and  
175 behavior. *Learn Mem* **26**, 191-205, doi:10.1101/lm.048389.118 (2019).

- 176 13 Cohen, J. D., Bolstad, M. & Lee, A. K. Experience-dependent shaping of hippocampal CA1  
177 intracellular activity in novel and familiar environments. *Elife* **6**, doi:10.7554/eLife.23040  
178 (2017).
- 179 14 Diamantaki, M. *et al.* Manipulating Hippocampal Place Cell Activity by Single-Cell  
180 Stimulation in Freely Moving Mice. *Cell Rep* **23**, 32-38, doi:10.1016/j.celrep.2018.03.031  
181 (2018).
- 182 15 Mehta, M. R., Quirk, M. C. & Wilson, M. A. Experience-dependent asymmetric shape of  
183 hippocampal receptive fields. *Neuron* **25**, 707-715, doi:10.1016/s0896-6273(00)81072-7  
184 (2000).
- 185 16 Dan, Y. & Poo, M. M. Spike timing-dependent plasticity of neural circuits. *Neuron* **44**, 23-  
186 30, doi:10.1016/j.neuron.2004.09.007 (2004).
- 187 17 Sadowski, J. H., Jones, M. W. & Mellor, J. R. Sharp-Wave Ripples Orchestrate the  
188 Induction of Synaptic Plasticity during Reactivation of Place Cell Firing Patterns in the  
189 Hippocampus. *Cell Rep* **14**, 1916-1929, doi:10.1016/j.celrep.2016.01.061 (2016).
- 190 18 Lee, S. W., O'Doherty, J. P. & Shimojo, S. Neural computations mediating one-shot  
191 learning in the human brain. *PLoS Biol* **13**, e1002137, doi:10.1371/journal.pbio.1002137  
192 (2015).
- 193 19 Stachenfeld, K. L., Botvinick, M. M. & Gershman, S. J. The hippocampus as a predictive  
194 map. *Nat Neurosci* **20**, 1643-1653, doi:10.1038/nn.4650 (2017).
- 195 20 Clewett, D., DuBrow, S. & Davachi, L. Transcending time in the brain: How event  
196 memories are constructed from experience. *Hippocampus* **29**, 162-183,  
197 doi:10.1002/hipo.23074 (2019).

- 198 21 Dombeck, D. A., Harvey, C. D., Tian, L., Looger, L. L. & Tank, D. W. Functional imaging of  
199 hippocampal place cells at cellular resolution during virtual navigation. *Nat Neurosci* **13**,  
200 1433-1440, doi:10.1038/nn.2648 (2010).
- 201 22 Heys, J. G., Rangarajan, K. V. & Dombeck, D. A. The functional micro-organization of grid  
202 cells revealed by cellular-resolution imaging. *Neuron* **84**, 1079-1090,  
203 doi:10.1016/j.neuron.2014.10.048 (2014).
- 204 23 Aronov, D., Nevers, R. & Tank, D. W. Mapping of a non-spatial dimension by the  
205 hippocampal-entorhinal circuit. *Nature* **543**, 719-722, doi:10.1038/nature21692 (2017).
- 206 24 Mukamel, E. A., Nimmerjahn, A. & Schnitzer, M. J. Automated analysis of cellular signals  
207 from large-scale calcium imaging data. *Neuron* **63**, 747-760,  
208 doi:10.1016/j.neuron.2009.08.009 (2009).
- 209 25 Tampuu, A., Matiisen, T., Olafsdottir, H. F., Barry, C. & Vicente, R. Efficient neural  
210 decoding of self-location with a deep recurrent network. *PLoS Comput Biol* **15**,  
211 e1006822, doi:10.1371/journal.pcbi.1006822 (2019).
- 212 26 Ho, J., Tumkaya, T., Aryal, S., Choi, H. & Claridge-Chang, A. Moving beyond P values: data  
213 analysis with estimation graphics. *Nat Methods* **16**, 565-566, doi:10.1038/s41592-019-  
214 0470-3 (2019).
- 215 27 Dragoi, G. & Tonegawa, S. Preplay of future place cell sequences by hippocampal  
216 cellular assemblies. *Nature* **469**, 397-401, doi:10.1038/nature09633 (2011).

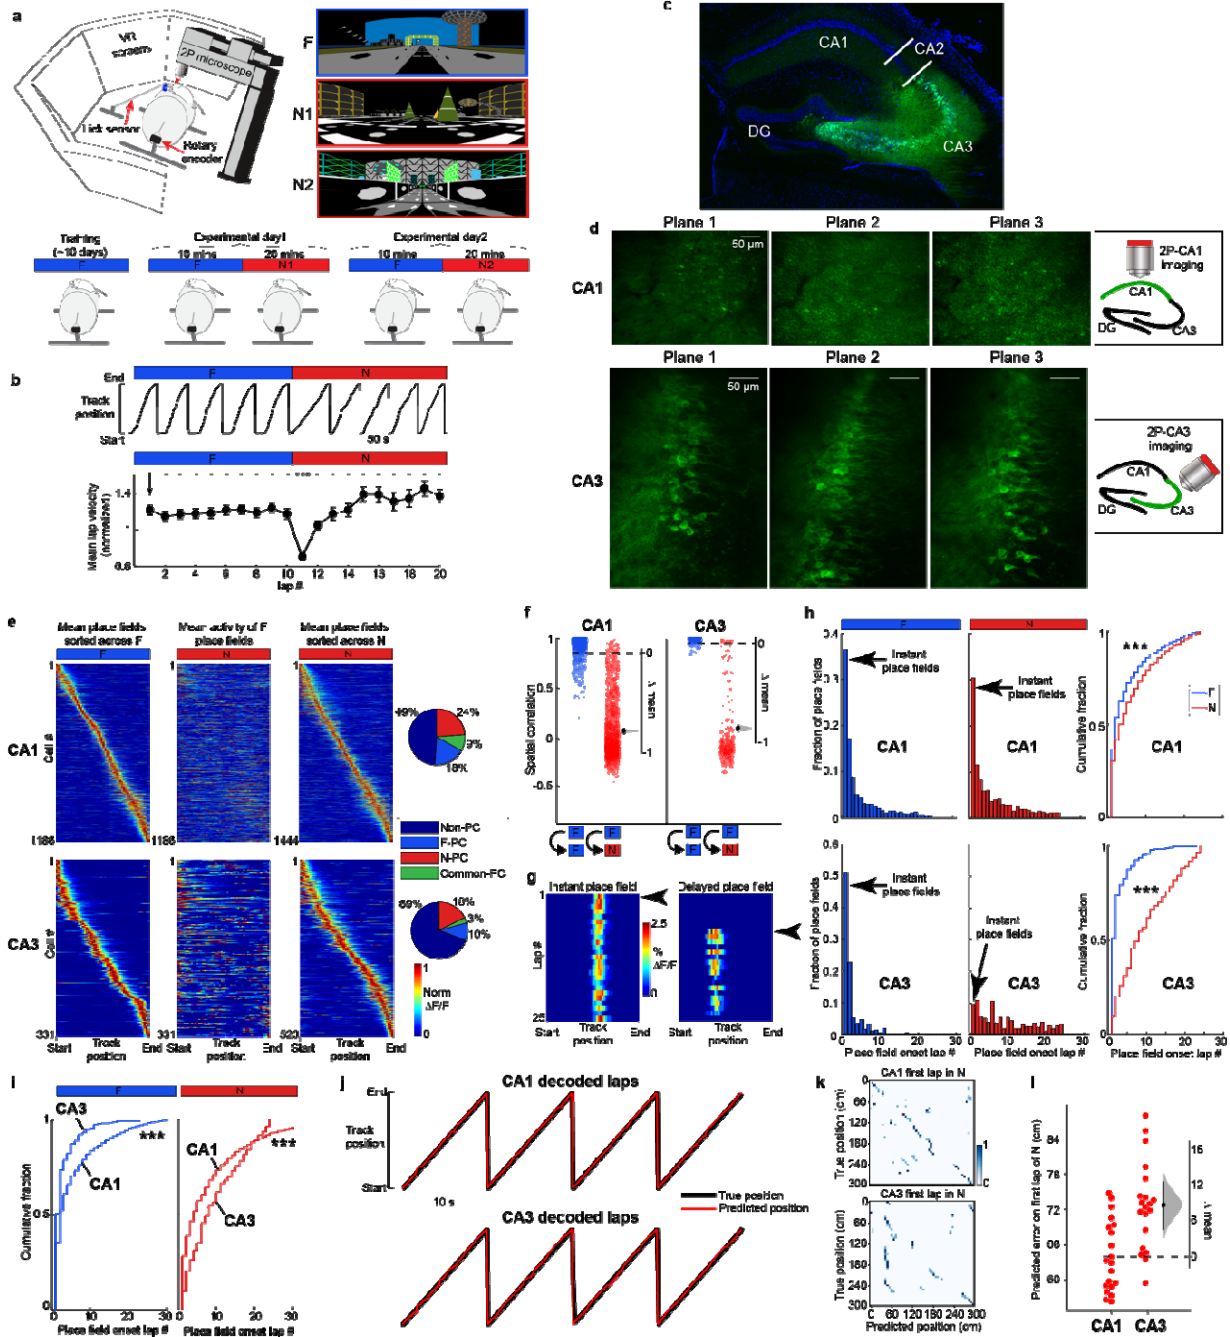

217

218 **Fig. 1: Place field formation in novel contexts is rapid in CA1 but gradual in CA3**

219 **a**, Top left, depiction of the virtual reality (VR) set up. Top right, the familiar (F) and two novel

220 (N1 and N2) contexts. Bottom: Scheme of the experimental procedure. **b**, Top: Single mouse

221 behavior showing track position versus time during an F to N switch. Bottom: Summary data

222 across all mice of mean lap velocity during F and N ( $n = 20$  sessions in 11 mice). Lap velocity is

223 normalized to the mean lap velocity in each mouse  $\pm$  SEM, and each lap is compared to the first  
224 lap in F using a one-way ANOVA with Tukey HSD post hoc test. \*\*\*,  $P < 0.001$ . **c**, Brain slice  
225 showing specific CA3 expression of cre-dependent GCaMP6f (green) and DAPI for nuclei (blue)  
226 from a Girk4-cre transgenic mouse. **d**, Example field of views (FOV) from multiplane imaging in  
227 CA1 (top) and CA3 (bottom). Right: scheme of the position for the objective during imaging.  
228 Scale bar = 50  $\mu$ m. **e**, Left: mean place fields in F sorted by track position. Middle: mean activity  
229 of the same neurons on the left in N. Right: mean place fields in N sorted by track position. Far  
230 right: Percentage of place cells in F and N or common to both from all active neurons. CA1, top  
231 panels; CA3, bottom panels.  $\Delta F/F$  activity is normalized to each neurons' maximum transient.  $n$   
232 = 7 sessions in 4 mice for CA1,  $n = 13$  sessions in 7 mice for CA3. **f**, Pearson's correlation  
233 coefficient of each cell's mean place field within F (blue) and between F and N (red). Estimation  
234 plots of mean difference ( $\Delta$ ) shown on the right of each plot (see Methods). **g**, Example of an  
235 instant place field (left) and delayed place field (right) in N. Arrows indicate the place field onset  
236 lap. **h**, Histograms of place field onset laps in F (left) and N (middle) and cumulative fraction  
237 plots for F and N (right). Wilcoxon rank sum test. \*\*\*,  $P < 0.001$ . **i**, Cumulative fraction plots for  
238 CA1 and CA3 place field onset lap in F (left) and in N (right). Wilcoxon rank sum test. \*\*\*,  $P <$   
239  $0.001$ . **j**, Example mouse showing actual track position (black) on laps 37-40 and the predicted  
240 position (red) decoded by an LSTM decoder (see Methods). CA1, top; CA3, bottom. **k**,  
241 Confusion matrix between the predicted (x-axis) and the real (y-axis) position for the first lap in  
242 N. **l**, Predicted error on the first lap in N for CA1 and CA3. Each dot represents the decoding  
243 error for one decoder trial built based on the activity of 200 randomly chosen place cells from

244 CA1 (left) or CA3 (right).  $n = 20$  decoder trials. Estimation plot of mean difference ( $\Delta$ ) shown on  
245 the right.

246

247

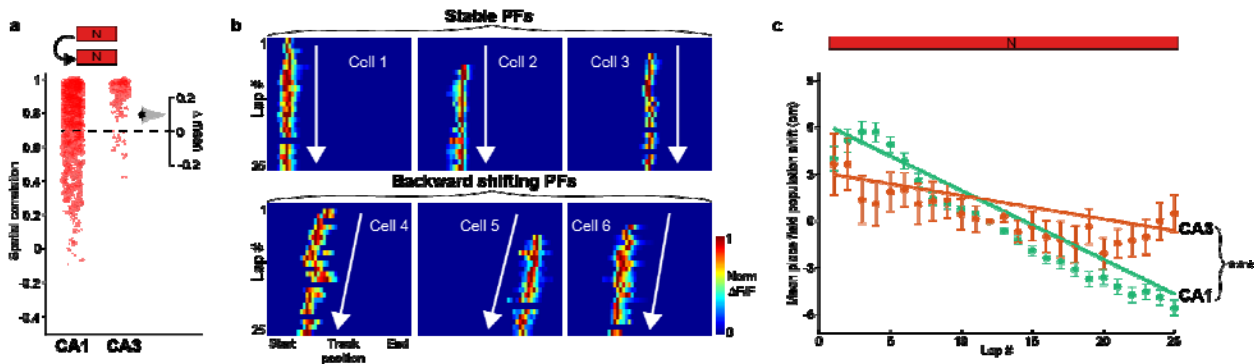

248 **Fig. 2: CA3 place fields exhibit relative stability while CA1 place fields continuously shift**

249 **backwards with experience in novel contexts**

250 **a**, Spatial correlation (Pearson's correlation coefficient) of mean place field activity within N

251 (first half versus second half of session in N). Estimation plot of mean difference ( $\Delta$ ) between

252 CA1 and CA3 shown on the right. **b**, 6 example place cells with stable place fields (top) or

253 backward shifting place fields (bottom) in N. Place field transients shown lap-by-lap for the first

254 25 laps. White arrows depict the direction of place fields with experience. **c**, Mean  $\pm$  SEM place

255 field shift from all place cells and all mice lap-by-lap in N in CA1 (green;  $n = 1444$  cells from 4

256 mice;) and CA3 (orange;  $n = 520$  cells from 7 mice;). For each place cell the COM of place field

257 transients on each lap was compared to the COM of place field transients on lap 12. Regression

258 lines are depicted on top of data and have statistically different slopes. \*\*\*,  $P < 0.001$ .

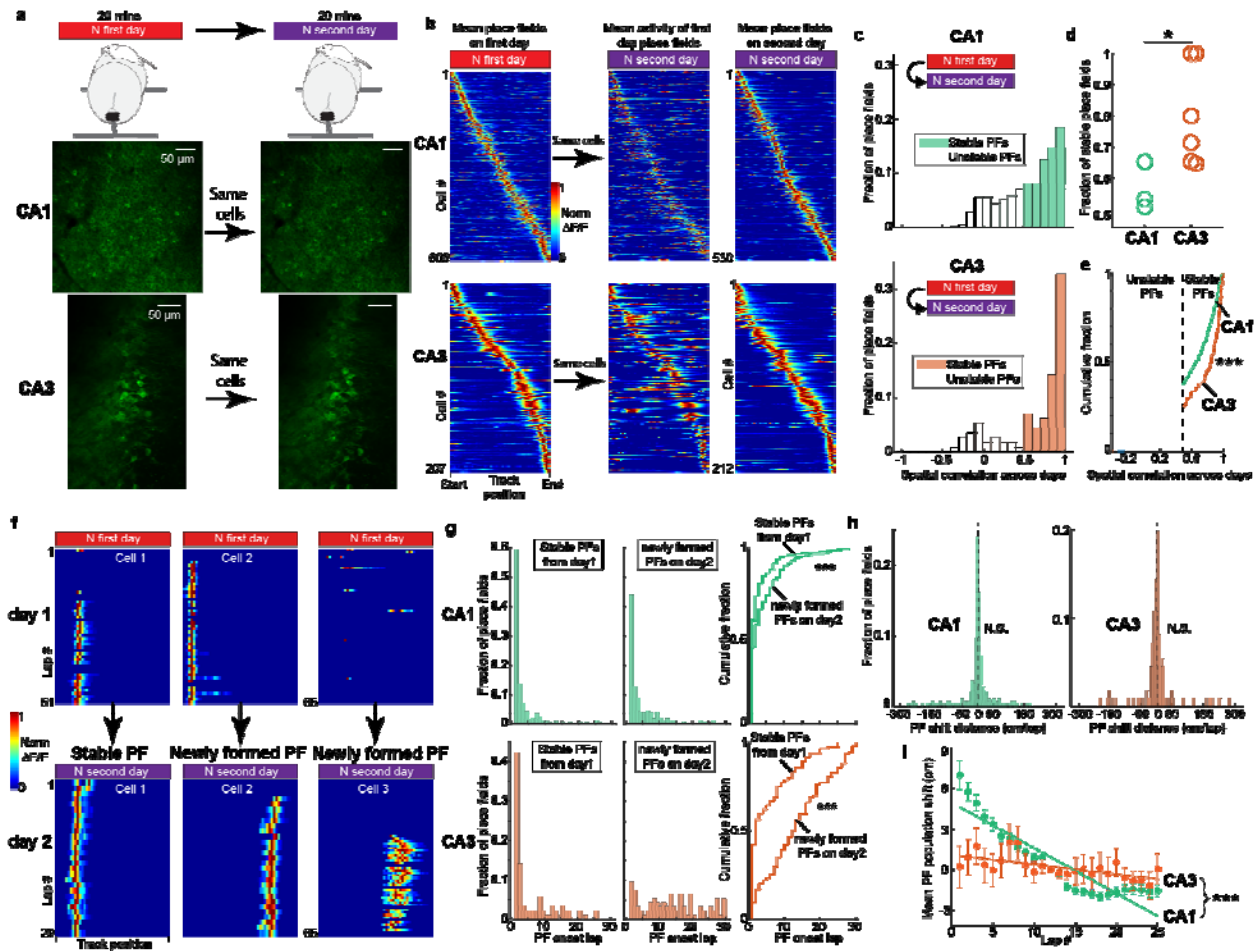

259

260 **Fig. 3: CA3 place fields exhibit higher stability across days than CA1 place fields**

261 **a**, Experimental setup. Top: mice are recorded for 20 min in N across 2 days. Bottom: example

262 field of view from one imaging plane from CA1 and CA3 across 2 days showing the same cells.

263 scale bar = 50  $\mu$ m. **b**, Left: mean place fields in N on day 1 sorted by track position. Middle:

264 mean activity of the same neurons on the left on day 2 in N. Right: mean place fields in N on

265 day 2 sorted by track position. **c**, Histograms of Pearson's correlation coefficient of mean place

266 field activity across days in N (only place cells with place fields on both days were used). Spatial

267 correlations greater than 0.5 were considered stable place fields and less than 0.5 unstable. **d**,

268 Fraction of stable place fields across days per mouse in CA1 and CA3. Unpaired t-test. \* $P < 0.05$ .



269 **e**, Cumulative fraction plots of Pearson's correlation coefficient in N across days in CA1 and CA3  
270 from the same data shown in (c). Wilcoxon rank sum test. **\*\*\***,  $P < 0.001$ . **f**, Example of a stable  
271 place field (left), an unstable place field with a newly formed place field on day 2 (middle) and a  
272 newly formed place field on day 2 (right). Place field transients shown lap by lap for all laps in N  
273 on day 1 and day 2 from the same 3 cells. **g**, Histograms of place field onset laps in N on day 2  
274 for stable place fields (left), and newly formed place fields (middle) in CA1 (top) and CA3  
275 (bottom). Right: cumulative fraction plots of histogram data. Wilcoxon rank sum test. **\*\*\***,  $P <$   
276  $0.001$ . **h**, Histogram of place field shifts across days for CA1 (left) and CA3 (right). The shifts  
277 were calculated by the difference between each place field's COM of the last active lap on day 1  
278 and first active lap in day 2. Only place cells with place fields on both days are included.  
279 Wilcoxon signed rank test, N.S.,  $P > 0.05$ . **i**, Mean  $\pm$  SEM place field shift from all place cells and  
280 all mice lap-by-lap in N on day 2 in CA1 (green;  $n = 530$  cells from 3 mice) and CA3 (orange;  $n =$   
281  $212$  cells from 6 mice). For each place cell the COM of place field transients on each lap was  
282 compared to the COM of place field transients on lap 12. Regression lines are depicted on top  
283 of data. **\*\*\***,  $P < 0.001$ .
